# Supplementary material
Source: PubMed Central journal article supplement (PMC6992477)
Supplement: NIHMS1546010-supplement-1.pdf [file NIHMS1546010-supplement-1.pdf]

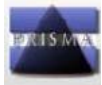

## PRISMA 2009 Checklist

| Section/topic                      | #  | Checklist item                                                                                                                                                                                                                                                                                              | Reported on page # |
|------------------------------------|----|-------------------------------------------------------------------------------------------------------------------------------------------------------------------------------------------------------------------------------------------------------------------------------------------------------------|--------------------|
| <b>TITLE</b>                       |    |                                                                                                                                                                                                                                                                                                             |                    |
| Title                              | 1  | Identify the report as a systematic review, meta-analysis, or both.                                                                                                                                                                                                                                         | 1                  |
| <b>ABSTRACT</b>                    |    |                                                                                                                                                                                                                                                                                                             |                    |
| Structured summary                 | 2  | Provide a structured summary including, as applicable: background; objectives; data sources; study eligibility criteria, participants, and interventions; study appraisal and synthesis methods; results; limitations; conclusions and implications of key findings; systematic review registration number. | 3                  |
| <b>INTRODUCTION</b>                |    |                                                                                                                                                                                                                                                                                                             |                    |
| Rationale                          | 3  | Describe the rationale for the review in the context of what is already known.                                                                                                                                                                                                                              | 5                  |
| Objectives                         | 4  | Provide an explicit statement of questions being addressed with reference to participants, interventions, comparisons, outcomes, and study design (PICOS).                                                                                                                                                  | 4-5                |
| <b>METHODS</b>                     |    |                                                                                                                                                                                                                                                                                                             |                    |
| Protocol and registration          | 5  | Indicate if a review protocol exists, if and where it can be accessed (e.g., Web address), and, if available, provide registration information including registration number.                                                                                                                               | N/A                |
| Eligibility criteria               | 6  | Specify study characteristics (e.g., PICOS, length of follow-up) and report characteristics (e.g., years considered, language, publication status) used as criteria for eligibility, giving rationale.                                                                                                      | 9-10               |
| Information sources                | 7  | Describe all information sources (e.g., databases with dates of coverage, contact with study authors to identify additional studies) in the search and date last searched.                                                                                                                                  | 9-10               |
| Search                             | 8  | Present full electronic search strategy for at least one database, including any limits used, such that it could be repeated.                                                                                                                                                                               | 9-10, S2           |
| Study selection                    | 9  | State the process for selecting studies (i.e., screening, eligibility, included in systematic review, and, if applicable, included in the meta-analysis).                                                                                                                                                   | 9-10               |
| Data collection process            | 10 | Describe method of data extraction from reports (e.g., piloted forms, independently, in duplicate) and any processes for obtaining and confirming data from investigators.                                                                                                                                  | 10                 |
| Data items                         | 11 | List and define all variables for which data were sought (e.g., PICOS, funding sources) and any assumptions and simplifications made.                                                                                                                                                                       | 10                 |
| Risk of bias in individual studies | 12 | Describe methods used for assessing risk of bias of individual studies (including specification of whether this was done at the study or outcome level), and how this information is to be used in any data synthesis.                                                                                      | 10                 |
| Summary measures                   | 13 | State the principal summary measures (e.g., risk ratio, difference in means).                                                                                                                                                                                                                               | N/A                |
| Synthesis of results               | 14 | Describe the methods of handling data and combining results of studies, if done, including measures of consistency (e.g., $I^2$ ) for each meta-analysis.                                                                                                                                                   | N/A                |

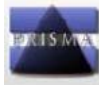

# PRISMA 2009 Checklist

Page 1 of 2

| Section/topic                 | #  | Checklist item                                                                                                                                                                                           | Reported on page # |
|-------------------------------|----|----------------------------------------------------------------------------------------------------------------------------------------------------------------------------------------------------------|--------------------|
| Risk of bias across studies   | 15 | Specify any assessment of risk of bias that may affect the cumulative evidence (e.g., publication bias, selective reporting within studies).                                                             | N/A                |
| Additional analyses           | 16 | Describe methods of additional analyses (e.g., sensitivity or subgroup analyses, meta-regression), if done, indicating which were pre-specified.                                                         | N/A                |
| <b>RESULTS</b>                |    |                                                                                                                                                                                                          |                    |
| Study selection               | 17 | Give numbers of studies screened, assessed for eligibility, and included in the review, with reasons for exclusions at each stage, ideally with a flow diagram.                                          | 9-10, 37           |
| Study characteristics         | 18 | For each study, present characteristics for which data were extracted (e.g., study size, PICOS, follow-up period) and provide the citations.                                                             | 38-46              |
| Risk of bias within studies   | 19 | Present data on risk of bias of each study and, if available, any outcome level assessment (see item 12).                                                                                                | 17, S4-6           |
| Results of individual studies | 20 | For all outcomes considered (benefits or harms), present, for each study: (a) simple summary data for each intervention group (b) effect estimates and confidence intervals, ideally with a forest plot. | N/A                |
| Synthesis of results          | 21 | Present results of each meta-analysis done, including confidence intervals and measures of consistency.                                                                                                  | N/A                |
| Risk of bias across studies   | 22 | Present results of any assessment of risk of bias across studies (see Item 15).                                                                                                                          | N/A                |
| Additional analysis           | 23 | Give results of additional analyses, if done (e.g., sensitivity or subgroup analyses, meta-regression [see Item 16]).                                                                                    | N/A                |
| <b>DISCUSSION</b>             |    |                                                                                                                                                                                                          |                    |
| Summary of evidence           | 24 | Summarize the main findings including the strength of evidence for each main outcome; consider their relevance to key groups (e.g., healthcare providers, users, and policy makers).                     | 20-22              |
| Limitations                   | 25 | Discuss limitations at study and outcome level (e.g., risk of bias), and at review-level (e.g., incomplete retrieval of identified research, reporting bias).                                            | 21-22              |
| Conclusions                   | 26 | Provide a general interpretation of the results in the context of other evidence, and implications for future research.                                                                                  | 20-22              |
| <b>FUNDING</b>                |    |                                                                                                                                                                                                          |                    |
| Funding                       | 27 | Describe sources of funding for the systematic review and other support (e.g., supply of data); role of funders for the systematic review.                                                               | 23                 |

From: Moher D, Liberati A, Tetzlaff J, Altman DG, The PRISMA Group (2009). Preferred Reporting Items for Systematic Reviews and Meta-Analyses: The PRISMA Statement. PLoS Med 6(7): e1000097. doi:10.1371/journal.pmed1000097

For more information, visit: [www.prisma-statement.org](http://www.prisma-statement.org).

Page 2 of 2

## SEARCH STRATEGY (07/08/2019)

| DATABASE       | SEARCH TERMS                                                                                                                                                                                                                                                                                                                                                                                                                                                                                                                                                                                                                                                                                                                                                                                                                                                                                                                                                                                                                                                                                                                                                                                                                                                                                                      | # SEARCHES |
|----------------|-------------------------------------------------------------------------------------------------------------------------------------------------------------------------------------------------------------------------------------------------------------------------------------------------------------------------------------------------------------------------------------------------------------------------------------------------------------------------------------------------------------------------------------------------------------------------------------------------------------------------------------------------------------------------------------------------------------------------------------------------------------------------------------------------------------------------------------------------------------------------------------------------------------------------------------------------------------------------------------------------------------------------------------------------------------------------------------------------------------------------------------------------------------------------------------------------------------------------------------------------------------------------------------------------------------------|------------|
| EMBASE         | <p style="text-align: right;">507</p> <p><b>#10</b><br/>#8 AND #9</p> <p style="text-align: right;">277,724</p> <p><b>#9</b><br/>#1 OR #2 OR #3 OR #4 OR #5 OR #6 OR #7</p> <p style="text-align: right;">143,911</p> <p><b>#8</b><br/>'systemic lupus erythematosus'/exp OR sle OR lupus</p> <p style="text-align: right;">8,459</p> <p><b>#7</b><br/>'smartphone'/exp</p> <p style="text-align: right;">37,240</p> <p><b>#6</b><br/>'mobile phone' OR 'mobile phones' OR 'smart phone' OR 'smart phones' OR smartphone* OR mhealth OR 'mobile app' OR 'mobile apps' OR 'mobile application' OR 'mobile applications' OR 'mobile device' OR 'mobile devices'</p> <p style="text-align: right;">29</p> <p><b>#5</b><br/>'mhealth'/exp</p> <p style="text-align: right;">8,462</p> <p><b>#4</b><br/>'mobile application'/exp</p> <p style="text-align: right;">252,766</p> <p><b>#3</b><br/>'internet'/exp OR 'internet' OR 'web based' OR 'mobile technology'/exp OR 'mobile technology' OR 'mobile technologies' OR 'ehealth'/exp OR 'ehealth' OR 'wearable' OR 'wearables' OR 'ios' OR 'android'/exp OR 'android' OR 'handheld'</p> <p style="text-align: right;">1,345</p> <p><b>#2</b><br/>'personal digital assistant'/exp</p> <p style="text-align: right;">102,888</p> <p><b>#1</b><br/>'internet'/exp</p> | 507        |
| WEB OF SCIENCE | <p><b># 3 337</b> #2 AND #1<br/><i>Databases= WOS, BCI, BIOSIS, CSCD, CCC, DRCI, DIIDW, FSTA, KJD, MEDLINE, RSCI, SCIELO, ZOOREC Timespan=All years<br/>Search language=Auto</i></p> <p><b># 2 2,035,747</b> TOPIC: (wearable' OR handheld OR internet OR "web based" OR "mobile technologies" OR "mobile technology" OR "ios" OR "android" OR "mobile device" OR "mobile devices" OR "mobile phone" OR "mobile phones" OR "mhealth" OR "app" OR "mobile application" OR "mobile applications" OR "apps" OR "smartphone" OR "smartphones" OR "ehealth")<br/><i>Databases= WOS, BCI, BIOSIS, CSCD, CCC, DRCI, DIIDW, FSTA, KJD, MEDLINE, RSCI, SCIELO, ZOOREC Timespan=All years<br/>Search language=Auto</i></p> <p><b># 1 217,719</b> TOPIC: (lupus OR SLE)<br/><i>Databases= WOS, BCI, BIOSIS, CSCD, CCC, DRCI, DIIDW, FSTA, KJD, MEDLINE, RSCI, SCIELO, ZOOREC Timespan=All years<br/>Search language=Auto</i></p>                                                                                                                                                                                                                                                                                                                                                                                             | 337        |
| MEDLINE        | <ol style="list-style-type: none"> <li>1. telemedicine.mp. [mp=ti, ab, ot, nm, hw, fx, kf, ox, px, rx, ui, sy, tx, kw, ct, sh]</li> <li>2. eHealth.mp. [mp=ti, ab, ot, nm, hw, fx, kf, ox, px, rx, ui, sy, tx, kw, ct, sh]</li> <li>3. mHealth.mp. [mp=ti, ab, ot, nm, hw, fx, kf, ox, px, rx, ui, sy, tx, kw, ct, sh]</li> <li>4. mobile health.mp. [mp=ti, ab, ot, nm, hw, fx, kf, ox, px, rx, ui, sy, tx, kw, ct, sh]</li> <li>5. app.mp. [mp=ti, ab, ot, nm, hw, fx, kf, ox, px, rx, ui, sy, tx, kw, ct, sh]</li> <li>6. apps.mp. [mp=ti, ab, ot, nm, hw, fx, kf, ox, px, rx, ui, sy, tx, kw, ct, sh]</li> <li>7. mobile application\$.mp. [mp=ti, ab, ot, nm, hw, fx, kf, ox, px, rx, ui, sy, tx, kw, ct, sh]</li> <li>8. mobile phone\$.mp. [mp=ti, ab, ot, nm, hw, fx, kf, ox, px, rx, ui, sy, tx, kw, ct, sh]</li> <li>9. mobile device\$.mp. [mp=ti, ab, ot, nm, hw, fx, kf, ox, px, rx, ui, sy, tx, kw, ct, sh]</li> <li>10. mobile technolog\$.mp. [mp=ti, ab, ot, nm, hw, fx, kf, ox, px, rx, ui, sy, tx, kw, ct, sh]</li> </ol>                                                                                                                                                                                                                                                                      | 276        |

|                  |                                                                                                                                                                                                                                                                                                                                                                                                                                                                                                                                                                                                                                                                                                                                                                                                                                                                                                                                                                                                                                                                                                                                                                                                                                                                                                                                                                                                                                                                                                                                                                                                                       |    |
|------------------|-----------------------------------------------------------------------------------------------------------------------------------------------------------------------------------------------------------------------------------------------------------------------------------------------------------------------------------------------------------------------------------------------------------------------------------------------------------------------------------------------------------------------------------------------------------------------------------------------------------------------------------------------------------------------------------------------------------------------------------------------------------------------------------------------------------------------------------------------------------------------------------------------------------------------------------------------------------------------------------------------------------------------------------------------------------------------------------------------------------------------------------------------------------------------------------------------------------------------------------------------------------------------------------------------------------------------------------------------------------------------------------------------------------------------------------------------------------------------------------------------------------------------------------------------------------------------------------------------------------------------|----|
|                  | <p>11. m-health.mp. [mp=ti, ab, ot, nm, hw, fx, kf, ox, px, rx, ui, sy, tx, kw, ct, sh]<br/> 12. e-health.mp. [mp=ti, ab, ot, nm, hw, fx, kf, ox, px, rx, ui, sy, tx, kw, ct, sh]<br/> 13. smartphone\$.mp. [mp=ti, ab, ot, nm, hw, fx, kf, ox, px, rx, ui, sy, tx, kw, ct, sh]<br/> 14. wearable.mp. [mp=ti, ab, ot, nm, hw, fx, kf, ox, px, rx, ui, sy, tx, kw, ct, sh]<br/> 15. handheld.mp. [mp=ti, ab, ot, nm, hw, fx, kf, ox, px, rx, ui, sy, tx, kw, ct, sh]<br/> 16. internet.mp. [mp=ti, ab, ot, nm, hw, fx, kf, ox, px, rx, ui, sy, tx, kw, ct, sh]<br/> 17. web-based.mp. [mp=ti, ab, ot, nm, hw, fx, kf, ox, px, rx, ui, sy, tx, kw, ct, sh]<br/> 18. 1 or 2 or 3 or 4 or 5 or 6 or 7 or 8 or 9 or 10 or 11 or 12 or 13 or 14 or 15 or 16 or 17<br/> 19. exp "Computers, handheld"/<br/> 20. exp "Internet"/<br/> 21. exp "Health Information Systems"/<br/> 22. exp "Wearable Electronic Devices"/<br/> 23. exp "Mobile Applications"/<br/> 24. exp "Smartphone"/<br/> 25. exp "Technology"/<br/> 26. exp "Telemedicine"/<br/> 27. 19 or 20 or 21 or 22 or 23 or 24 or 25 or 26<br/> 28. lupus.mp. [mp=ti, ab, ot, nm, hw, fx, kf, ox, px, rx, ui, sy, tx, kw, ct, sh]<br/> 29. lupus erythematosus.mp. [mp=ti, ab, ot, nm, hw, fx, kf, ox, px, rx, ui, sy, tx, kw, ct, sh]<br/> 30. SLE.mp. [mp=ti, ab, ot, nm, hw, fx, kf, ox, px, rx, ui, sy, tx, kw, ct, sh]<br/> 31. exp "Lupus Erythematosus, Systemic"/<br/> 32. 18 or 27<br/> 33. 28 or 29 or 30 or 31<br/> 34. 32 and 33<br/> 35. limit 34 to humans [Limit not valid in CDSR,CCTR; records were retained]</p> <p>remove duplicates from 35</p> |    |
| COCHRANE CENTRAL | <p>Database: EBM Reviews - Cochrane Central Register of Controlled Trials &lt;May 2019&gt;<br/> Search Strategy:</p> <p>-----</p> <p>1 (wearable* or handheld or internet or "web based" or "mobile technologies" or "mobile technology" or "ios" or "android" or "mobile device" or "mobile devices" or "mobile phone" or "mobile phones" or "mhealth" or "app" or "mobile application" or "mobile applications" or "apps" or "smartphone" or "smartphones" or "ehealth").mp. [mp=title, original title, abstract, mesh headings, heading words, keyword] (20824)<br/> 2 exp "Computers, Handheld"/ or exp "Internet"/ or exp "Health Information Systems"/ or exp "Wearable Electronic Devices"/ or "exp Mobile Applications"/ or exp "Smartphone"/ or exp "Technology"/ (8616)<br/> 3 1 or 2 (25653)<br/> 4 exp "Lupus Erythematosus, Systemic"/ (864)<br/> 5 (lupus or SLE).mp. [mp=title, original title, abstract, mesh headings, heading words, keyword] (3247)<br/> 6 4 or 5 (3247)<br/> 7 3 and 6 (26)</p>                                                                                                                                                                                                                                                                                                                                                                                                                                                                                                                                                                                                   | 26 |

Total: 1146 results

Duplicate: 360

**Supplementary File 3: Risk of Bias Distribution of the Included Randomized Trials**

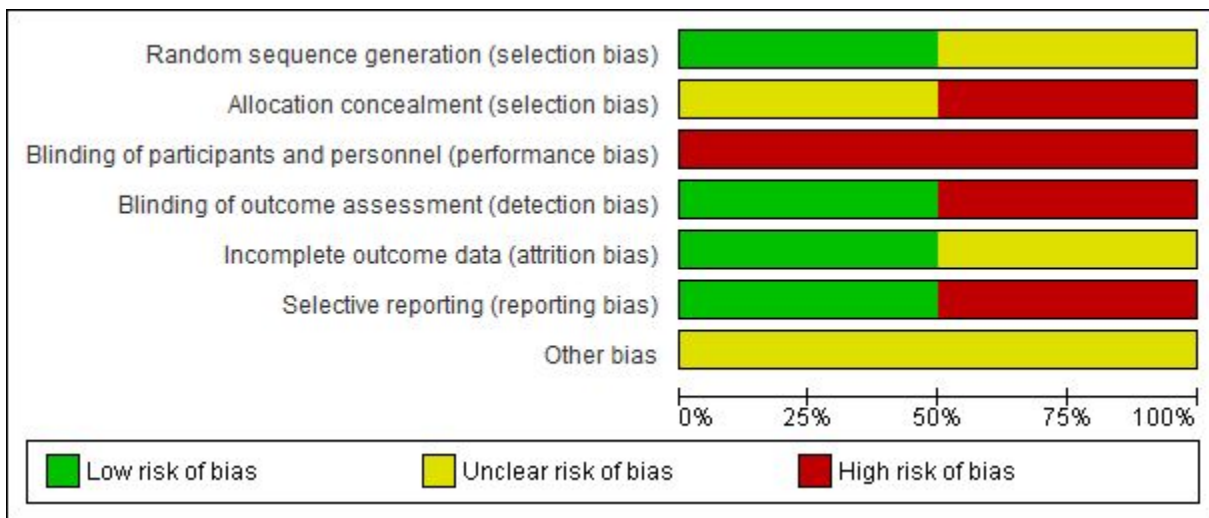

**Supplementary File 4: Risk of Bias Assessments of the Included Randomized Trials**

|              | Random sequence generation (selection bias) | Allocation concealment (selection bias) | Blinding of participants and personnel (performance bias) | Blinding of outcome assessment (detection bias) | Incomplete outcome data (attrition bias) | Selective reporting (reporting bias) | Other bias |
|--------------|---------------------------------------------|-----------------------------------------|-----------------------------------------------------------|-------------------------------------------------|------------------------------------------|--------------------------------------|------------|
| Rimmer, 2013 | +                                           | -                                       | -                                                         | +                                               | +                                        | +                                    | ?          |
| Ting, 2012   | ?                                           | ?                                       | -                                                         | -                                               | ?                                        | -                                    | ?          |

**Supplementary File 5.** Quality Ratings for Observational Studies (Newcastle Ottawa Quality Assessment)\*

\*Scale range 0 to 9, with higher scores indicating higher level of quality

| Author, year         | Selection                               |                                    |                              |                                                                             | Comparability†                                                     |                          | Outcome                                             |                                  |   | Total Score (out of 9) | Cross sectional? (Y/N) |
|----------------------|-----------------------------------------|------------------------------------|------------------------------|-----------------------------------------------------------------------------|--------------------------------------------------------------------|--------------------------|-----------------------------------------------------|----------------------------------|---|------------------------|------------------------|
|                      | 1. Representativeness of exposed cohort | 2. Selection of non-exposed cohort | 3. Ascertainment of exposure | 4. Demonstration that outcome of interest was not present at start of study | 1. Comparability of cohorts on the basis of the design or analysis | 1. Assessment of Outcome | 2. Was follow up long enough for outcomes to occur? | 3. Adequacy of follow up cohorts |   |                        |                        |
| Richter, 2008/2009   | 1                                       | 1                                  | 1                            | 1                                                                           | 0                                                                  | 0                        | 1                                                   | 1                                | 6 | Y                      |                        |
| Rhee, 2013           | 1                                       | 0                                  | 0                            | 1                                                                           | 0                                                                  | 1                        | 1                                                   | 1                                | 5 | Y                      |                        |
| Callejas-Rubio, 2014 | 1                                       | 0                                  | 0                            | 1                                                                           | 0                                                                  | 0                        | 1                                                   | 1                                | 4 | Y                      |                        |
| Jamilloux, 2015      | 1                                       | 1                                  | 1                            | 1                                                                           | 1                                                                  | 0                        | 1                                                   | 1                                | 7 | N                      |                        |
| Meunier, 2016        | 1                                       | 0                                  | 1                            | 1                                                                           | 0                                                                  | 0                        | 1                                                   | 1                                | 5 | N                      |                        |
| Balderas-Diaz, 2017  | 0                                       | 1                                  | 1                            | 1                                                                           | 0                                                                  | 1                        | 1                                                   | 1                                | 6 | N                      |                        |
| Sciascia, 2017       | 1                                       | 1                                  | 0                            | 0                                                                           | 0                                                                  | 1                        | 1                                                   | 1                                | 5 | N                      |                        |
| Reynolds, 2018       | 1                                       | 0                                  | 0                            | 0                                                                           | 0                                                                  | 1                        | 1                                                   | 1                                | 4 | Y                      |                        |
| Scalzi, 2018         | 1                                       | 1                                  | 1                            | 1                                                                           | 0                                                                  | 1                        | 1                                                   | 1                                | 7 | N                      |                        |

\*Scale range 0 to 9, with higher scores indicating higher level of quality

†Maximum possible points are equal to 2
